# Supplementary material
Source: publisher figshare collection journal article supplement (https://acs.figshare.com/ndownloader/files/3899257)
Supplement: Supplementary file 1 [file 3899257]

data_ew13neu

_audit_creation_method            SHELXL-97
_chemical_name_systematic
;
 ?
;
_chemical_name_common             ?
_chemical_melting_point           ?
_chemical_formula_moiety          
 'C60 H60 Fe N20 2+, 2(C2 H6 O), 2(B F4)'
_chemical_formula_sum
 'C64 H72 B2 F8 Fe N20 O2'
_chemical_formula_weight          1382.89

loop_
 _atom_type_symbol
 _atom_type_description
 _atom_type_scat_dispersion_real
 _atom_type_scat_dispersion_imag
 _atom_type_scat_source
 'C'  'C'   0.0033   0.0016
 'International Tables Vol C Tables 4.2.6.8 and 6.1.1.4'
 'H'  'H'   0.0000   0.0000
 'International Tables Vol C Tables 4.2.6.8 and 6.1.1.4'
 'N'  'N'   0.0061   0.0033
 'International Tables Vol C Tables 4.2.6.8 and 6.1.1.4'
 'O'  'O'   0.0106   0.0060
 'International Tables Vol C Tables 4.2.6.8 and 6.1.1.4'
 'B'  'B'   0.0013   0.0007
 'International Tables Vol C Tables 4.2.6.8 and 6.1.1.4'
 'F'  'F'   0.0171   0.0103
 'International Tables Vol C Tables 4.2.6.8 and 6.1.1.4'
 'Fe'  'Fe'   0.3463   0.8444
 'International Tables Vol C Tables 4.2.6.8 and 6.1.1.4'

_symmetry_cell_setting            Monoclinic
_symmetry_space_group_name_H-M    'P 21/c'

loop_
 _symmetry_equiv_pos_as_xyz
 'x, y, z'
 '-x, y+1/2, -z+1/2'
 '-x, -y, -z'
 'x, -y-1/2, z-1/2'

_cell_length_a                    14.0803(8)
_cell_length_b                    15.3498(9)
_cell_length_c                    16.0912(9)
_cell_angle_alpha                 90.00
_cell_angle_beta                  106.798(4)
_cell_angle_gamma                 90.00
_cell_volume                      3329.4(3)
_cell_formula_units_Z             2
_cell_measurement_temperature     133(2)
_cell_measurement_reflns_used     36964
_cell_measurement_theta_min       1.51
_cell_measurement_theta_max       25.70

_exptl_crystal_description        block
_exptl_crystal_colour             colorless
_exptl_crystal_size_max           0.55
_exptl_crystal_size_mid           0.52
_exptl_crystal_size_min           0.50
_exptl_crystal_density_meas       ?
_exptl_crystal_density_diffrn     1.379
_exptl_crystal_density_method     'not measured'
_exptl_crystal_F_000              1440
_exptl_absorpt_coefficient_mu     0.310
_exptl_absorpt_correction_type    numerical
_exptl_absorpt_correction_T_min   0.7303
_exptl_absorpt_correction_T_max   0.9090
_exptl_absorpt_process_details    'X-RED (Stoe & Cie, 2002)'

_exptl_special_details
;
 ?
;

_diffrn_ambient_temperature       133(2)
_diffrn_radiation_wavelength      0.71073
_diffrn_radiation_type            MoK\a
_diffrn_radiation_source          'fine-focus sealed tube'
_diffrn_radiation_monochromator   graphite
_diffrn_measurement_device_type   'Stoe IPDS II'
_diffrn_measurement_method        \w
_diffrn_detector_area_resol_mean  ?
_diffrn_standards_number          ?
_diffrn_standards_interval_count  ?
_diffrn_standards_interval_time   ?
_diffrn_standards_decay_%         ?
_diffrn_reflns_number             36964
_diffrn_reflns_av_R_equivalents   0.0813
_diffrn_reflns_av_sigmaI/netI     0.0448
_diffrn_reflns_limit_h_min        -17
_diffrn_reflns_limit_h_max        16
_diffrn_reflns_limit_k_min        -18
_diffrn_reflns_limit_k_max        18
_diffrn_reflns_limit_l_min        -19
_diffrn_reflns_limit_l_max        19
_diffrn_reflns_theta_min          1.51
_diffrn_reflns_theta_max          25.70
_reflns_number_total              6288
_reflns_number_gt                 4992
_reflns_threshold_expression      >2sigma(I)

_computing_data_collection        'X-AREA (Stoe & Cie, 2002)'
_computing_cell_refinement        'X-AREA (Stoe & Cie, 2002)'
_computing_data_reduction         'X-AREA (Stoe & Cie, 2002)'
_computing_structure_solution     'SHELXS-97 (Sheldrick, 1990)'
_computing_structure_refinement   'SHELXL-97 (Sheldrick, 1997)'
_computing_molecular_graphics     'DIAMOND (Brandenburg, 2001)'
_computing_publication_material   'SHELXL-97 (Sheldrick, 1997)'

_refine_special_details
;
 Refinement of F^2^ against ALL reflections.  The weighted R-factor wR and
 goodness of fit S are based on F^2^, conventional R-factors R are based
 on F, with F set to zero for negative F^2^. The threshold expression of
 F^2^ > 2sigma(F^2^) is used only for calculating R-factors(gt) etc. and is
 not relevant to the choice of reflections for refinement.  R-factors based
 on F^2^ are statistically about twice as large as those based on F, and R-
 factors based on ALL data will be even larger.
;

_refine_ls_structure_factor_coef  Fsqd
_refine_ls_matrix_type            full
_refine_ls_weighting_scheme       calc
_refine_ls_weighting_details
 'calc w=1/[\s^2^(Fo^2^)+(0.1113P)^2^+11.9582P] where P=(Fo^2^+2Fc^2^)/3'
_atom_sites_solution_primary      direct
_atom_sites_solution_secondary    difmap
_atom_sites_solution_hydrogens    geom
_refine_ls_hydrogen_treatment     constr
_refine_ls_extinction_method      none
_refine_ls_extinction_coef        ?
_refine_ls_number_reflns          6288
_refine_ls_number_parameters      435
_refine_ls_number_restraints      58
_refine_ls_R_factor_all           0.1193
_refine_ls_R_factor_gt            0.0990
_refine_ls_wR_factor_ref          0.2688
_refine_ls_wR_factor_gt           0.2535
_refine_ls_goodness_of_fit_ref    1.106
_refine_ls_restrained_S_all       1.126
_refine_ls_shift/su_max           0.000
_refine_ls_shift/su_mean          0.000

loop_
 _atom_site_label
 _atom_site_type_symbol
 _atom_site_fract_x
 _atom_site_fract_y
 _atom_site_fract_z
 _atom_site_U_iso_or_equiv
 _atom_site_adp_type
 _atom_site_occupancy
 _atom_site_symmetry_multiplicity
 _atom_site_calc_flag
 _atom_site_refinement_flags
 _atom_site_disorder_assembly
 _atom_site_disorder_group
Fe1 Fe 0.5000 0.5000 0.5000 0.0302(3) Uani 1 2 d S . .
N1 N 0.6312(3) 0.5927(3) 0.5077(3) 0.0322(9) Uani 1 1 d . . .
N11 N 0.5152(3) 0.5075(3) 0.3729(3) 0.0355(9) Uani 1 1 d . . .
N12 N 0.4613(4) 0.4708(3) 0.2995(3) 0.0395(10) Uani 1 1 d . . .
N13 N 0.5235(4) 0.4562(3) 0.2535(3) 0.0397(10) Uani 1 1 d . . .
N21 N 0.4305(3) 0.6260(3) 0.4917(3) 0.0343(9) Uani 1 1 d . . .
N22 N 0.3466(3) 0.6529(3) 0.5034(3) 0.0357(10) Uani 1 1 d . . .
N23 N 0.3540(3) 0.7400(3) 0.5087(3) 0.0340(9) Uani 1 1 d . . .
N31 N 0.8762(4) 0.6071(3) 0.6031(3) 0.0480(12) Uani 1 1 d . . .
N32 N 0.9473(4) 0.6619(4) 0.6032(4) 0.0512(13) Uani 1 1 d . . .
N33 N 0.9097(3) 0.7423(3) 0.6024(3) 0.0456(11) Uani 1 1 d . . .
C10 C 0.6848(4) 0.5534(3) 0.4499(3) 0.0366(11) Uani 1 1 d . . .
H10A H 0.7288 0.5078 0.4805 0.080 Uiso 1 1 calc R . .
H10B H 0.7243 0.5975 0.4321 0.080 Uiso 1 1 calc R . .
C11 C 0.6097(4) 0.5162(3) 0.3715(3) 0.0342(11) Uani 1 1 d . . .
C12 C 0.6163(4) 0.4834(3) 0.2940(4) 0.0392(12) Uani 1 1 d . . .
H12 H 0.6719 0.4807 0.2740 0.080 Uiso 1 1 calc R . .
C13 C 0.4872(5) 0.4050(4) 0.1716(4) 0.0473(14) Uani 1 1 d . . .
H13A H 0.4464 0.4414 0.1258 0.080 Uiso 1 1 calc R . .
H13B H 0.5428 0.3836 0.1534 0.080 Uiso 1 1 calc R . .
C14 C 0.4278(4) 0.3307(3) 0.1892(3) 0.0364(11) Uani 1 1 d . . .
C15 C 0.4746(4) 0.2647(4) 0.2460(4) 0.0425(13) Uani 1 1 d . . .
H15 H 0.5433 0.2650 0.2684 0.080 Uiso 1 1 calc R . .
C16 C 0.4206(5) 0.1989(4) 0.2696(4) 0.0494(15) Uani 1 1 d . . .
H16 H 0.4526 0.1556 0.3078 0.080 Uiso 1 1 calc R . .
C17 C 0.3171(5) 0.1983(4) 0.2354(4) 0.0503(15) Uani 1 1 d . . .
H17 H 0.2799 0.1551 0.2519 0.080 Uiso 1 1 calc R . .
C18 C 0.2708(4) 0.2613(4) 0.1775(4) 0.0505(15) Uani 1 1 d . . .
H18 H 0.2023 0.2594 0.1533 0.080 Uiso 1 1 calc R . .
C19 C 0.3252(4) 0.3278(4) 0.1550(4) 0.0430(13) Uani 1 1 d . . .
H19 H 0.2927 0.3709 0.1166 0.080 Uiso 1 1 calc R . .
C20 C 0.5872(4) 0.6778(3) 0.4707(3) 0.0326(11) Uani 1 1 d . . .
H20A H 0.6334 0.7244 0.4952 0.080 Uiso 1 1 calc R . .
H20B H 0.5765 0.6776 0.4084 0.080 Uiso 1 1 calc R . .
C21 C 0.4914(4) 0.6946(3) 0.4894(3) 0.0318(10) Uani 1 1 d . . .
C22 C 0.4421(4) 0.7686(3) 0.5010(3) 0.0348(11) Uani 1 1 d . . .
H22 H 0.4643 0.8259 0.5031 0.080 Uiso 1 1 calc R . .
C23 C 0.2682(4) 0.7911(4) 0.5193(4) 0.0431(13) Uani 1 1 d . . .
H23A H 0.2074 0.7677 0.4807 0.080 Uiso 1 1 calc R . .
H23B H 0.2744 0.8510 0.5025 0.080 Uiso 1 1 calc R . .
C24 C 0.2618(4) 0.7891(4) 0.6106(4) 0.0396(12) Uani 1 1 d . . .
C25 C 0.2306(4) 0.7149(4) 0.6449(4) 0.0460(13) Uani 1 1 d . . .
H25 H 0.2160 0.6647 0.6113 0.080 Uiso 1 1 calc R . .
C26 C 0.2211(5) 0.7143(5) 0.7268(4) 0.0552(16) Uani 1 1 d . . .
H26 H 0.1992 0.6643 0.7482 0.080 Uiso 1 1 calc R . .
C27 C 0.2438(5) 0.7877(6) 0.7776(4) 0.066(2) Uani 1 1 d . . .
H27 H 0.2374 0.7874 0.8335 0.080 Uiso 1 1 calc R . .
C28 C 0.2759(6) 0.8617(6) 0.7456(5) 0.070(2) Uani 1 1 d . . .
H28 H 0.2912 0.9113 0.7801 0.080 Uiso 1 1 calc R . .
C29 C 0.2857(5) 0.8630(4) 0.6626(4) 0.0554(16) Uani 1 1 d . . .
H29 H 0.3081 0.9130 0.6416 0.080 Uiso 1 1 calc R . .
C30 C 0.6978(4) 0.6049(3) 0.5975(3) 0.0360(11) Uani 1 1 d . . .
H30A H 0.7139 0.5482 0.6244 0.080 Uiso 1 1 calc R . .
H30B H 0.6622 0.6372 0.6309 0.080 Uiso 1 1 calc R . .
C31 C 0.7923(4) 0.6520(3) 0.6023(3) 0.0359(11) Uani 1 1 d . . .
C32 C 0.8133(4) 0.7394(4) 0.6019(4) 0.0421(13) Uani 1 1 d . . .
H32 H 0.7709 0.7860 0.6015 0.080 Uiso 1 1 calc R . .
C33 C 0.9691(5) 0.8195(4) 0.5948(4) 0.0541(16) Uani 1 1 d . . .
H33A H 1.0373 0.8101 0.6289 0.080 Uiso 1 1 calc R . .
H33B H 0.9442 0.8696 0.6187 0.080 Uiso 1 1 calc R . .
C34 C 0.9665(4) 0.8391(5) 0.5016(4) 0.0560(17) Uani 1 1 d . . .
C35 C 1.0084(5) 0.7800(6) 0.4555(5) 0.0636(19) Uani 1 1 d . . .
H35 H 1.0353 0.7281 0.4816 0.080 Uiso 1 1 calc R . .
C36 C 1.0102(6) 0.7978(8) 0.3728(5) 0.086(3) Uani 1 1 d . . .
H36 H 1.0385 0.7584 0.3431 0.080 Uiso 1 1 calc R . .
C37 C 0.9702(8) 0.8739(10) 0.3341(7) 0.107(4) Uani 1 1 d . . .
H37 H 0.9723 0.8857 0.2779 0.080 Uiso 1 1 calc R . .
C38 C 0.9280(8) 0.9320(7) 0.3748(7) 0.102(4) Uani 1 1 d . . .
H38 H 0.9015 0.9834 0.3471 0.080 Uiso 1 1 calc R . .
C39 C 0.9242(6) 0.9142(5) 0.4620(6) 0.080(3) Uani 1 1 d . . .
H39 H 0.8936 0.9530 0.4905 0.080 Uiso 1 1 calc R . .
B1A B 0.6879(6) 0.9758(5) 0.5744(5) 0.036(3) Uiso 0.586(9) 1 d PD A 1
F1A F 0.7745(5) 0.9378(5) 0.6258(5) 0.081(3) Uiso 0.586(9) 1 d PD A 1
F2A F 0.7012(6) 0.9938(5) 0.4945(4) 0.071(2) Uiso 0.586(9) 1 d PD A 1
F3A F 0.6756(5) 1.0533(5) 0.6140(5) 0.071(2) Uiso 0.586(9) 1 d PD A 1
F4A F 0.6064(7) 0.9258(7) 0.5742(6) 0.103(3) Uiso 0.586(9) 1 d PD A 1
B1B B 0.6770(8) 0.9726(6) 0.5574(8) 0.064(8) Uiso 0.414(9) 1 d PD A 2
F1B F 0.6938(13) 1.0091(11) 0.6382(9) 0.154(8) Uiso 0.414(9) 1 d PD A 2
F2B F 0.7665(9) 0.9587(10) 0.5411(10) 0.127(6) Uiso 0.414(9) 1 d PD A 2
F3B F 0.6311(6) 0.8929(5) 0.5510(5) 0.045(2) Uiso 0.414(9) 1 d PD A 2
F4B F 0.6239(8) 1.0289(7) 0.4953(7) 0.087(4) Uiso 0.414(9) 1 d PD A 2
O1 O 0.9096(9) 0.9663(9) 0.8749(8) 0.189(5) Uani 1 1 d . . .
H1 H 0.9339 1.0126 0.8963 0.283 Uiso 1 1 calc R . .
C42 C 0.9623(10) 0.9353(8) 0.8130(8) 0.118(4) Uani 1 1 d . . .
H42A H 0.9572 0.9777 0.7673 0.142 Uiso 1 1 calc R . .
H42B H 0.9344 0.8805 0.7869 0.142 Uiso 1 1 calc R . .
C43 C 1.0676(7) 0.9235(6) 0.8651(9) 0.118(5) Uani 1 1 d . . .
H43A H 1.1057 0.9038 0.8280 0.177 Uiso 1 1 calc R . .
H43B H 1.0712 0.8811 0.9098 0.177 Uiso 1 1 calc R . .
H43C H 1.0937 0.9780 0.8911 0.177 Uiso 1 1 calc R . .

loop_
 _atom_site_aniso_label
 _atom_site_aniso_U_11
 _atom_site_aniso_U_22
 _atom_site_aniso_U_33
 _atom_site_aniso_U_23
 _atom_site_aniso_U_13
 _atom_site_aniso_U_12
Fe1 0.0372(6) 0.0175(5) 0.0363(5) -0.0020(4) 0.0113(4) -0.0034(4)
N1 0.035(2) 0.023(2) 0.036(2) 0.0027(17) 0.0064(17) -0.0016(17)
N11 0.047(2) 0.025(2) 0.036(2) -0.0021(17) 0.0126(19) -0.0050(18)
N12 0.049(3) 0.029(2) 0.040(2) -0.0066(18) 0.013(2) -0.008(2)
N13 0.054(3) 0.029(2) 0.039(2) -0.0054(18) 0.018(2) -0.011(2)
N21 0.040(2) 0.023(2) 0.039(2) -0.0016(17) 0.0113(19) -0.0059(18)
N22 0.037(2) 0.028(2) 0.042(2) 0.0005(18) 0.0114(19) -0.0014(18)
N23 0.039(2) 0.024(2) 0.040(2) 0.0028(17) 0.0119(19) 0.0039(17)
N31 0.036(2) 0.046(3) 0.058(3) 0.008(2) 0.008(2) 0.005(2)
N32 0.036(3) 0.053(3) 0.061(3) 0.002(2) 0.008(2) 0.005(2)
N33 0.036(2) 0.047(3) 0.050(3) 0.000(2) 0.008(2) -0.005(2)
C10 0.040(3) 0.028(2) 0.041(3) -0.001(2) 0.011(2) -0.003(2)
C11 0.042(3) 0.017(2) 0.047(3) 0.0017(19) 0.017(2) 0.0013(19)
C12 0.051(3) 0.024(2) 0.044(3) 0.001(2) 0.017(3) -0.003(2)
C13 0.062(4) 0.043(3) 0.038(3) -0.009(2) 0.016(3) -0.010(3)
C14 0.046(3) 0.028(2) 0.035(3) -0.008(2) 0.010(2) -0.001(2)
C15 0.039(3) 0.038(3) 0.043(3) -0.006(2) 0.000(2) -0.004(2)
C16 0.067(4) 0.033(3) 0.040(3) -0.005(2) 0.002(3) -0.003(3)
C17 0.057(4) 0.036(3) 0.063(4) -0.013(3) 0.025(3) -0.012(3)
C18 0.037(3) 0.050(3) 0.063(4) -0.014(3) 0.012(3) -0.004(3)
C19 0.050(3) 0.033(3) 0.043(3) -0.003(2) 0.007(3) 0.010(2)
C20 0.034(3) 0.020(2) 0.042(3) 0.002(2) 0.009(2) -0.0013(19)
C21 0.038(3) 0.023(2) 0.032(2) -0.0003(19) 0.007(2) -0.004(2)
C22 0.043(3) 0.025(2) 0.037(3) 0.002(2) 0.010(2) -0.001(2)
C23 0.039(3) 0.039(3) 0.051(3) 0.007(2) 0.013(2) 0.013(2)
C24 0.032(3) 0.036(3) 0.048(3) -0.001(2) 0.007(2) 0.004(2)
C25 0.041(3) 0.042(3) 0.053(3) 0.009(3) 0.011(3) 0.006(2)
C26 0.048(4) 0.062(4) 0.055(4) 0.016(3) 0.016(3) 0.003(3)
C27 0.053(4) 0.107(6) 0.039(3) 0.002(4) 0.014(3) 0.003(4)
C28 0.069(5) 0.078(5) 0.060(4) -0.025(4) 0.017(4) -0.010(4)
C29 0.062(4) 0.046(3) 0.059(4) -0.006(3) 0.018(3) -0.004(3)
C30 0.040(3) 0.030(3) 0.034(3) 0.003(2) 0.006(2) -0.001(2)
C31 0.035(3) 0.036(3) 0.037(3) 0.000(2) 0.009(2) -0.002(2)
C32 0.032(3) 0.042(3) 0.051(3) -0.007(2) 0.011(2) -0.006(2)
C33 0.039(3) 0.053(4) 0.066(4) -0.006(3) 0.008(3) -0.016(3)
C34 0.031(3) 0.070(4) 0.059(4) 0.007(3) 0.000(3) -0.015(3)
C35 0.038(3) 0.094(6) 0.057(4) 0.003(4) 0.011(3) -0.007(3)
C36 0.050(4) 0.145(9) 0.059(5) -0.006(5) 0.011(4) -0.030(5)
C37 0.090(7) 0.145(11) 0.068(6) 0.017(7) -0.006(5) -0.068(8)
C38 0.092(7) 0.086(7) 0.096(7) 0.034(6) -0.027(6) -0.052(6)
C39 0.059(4) 0.057(4) 0.101(6) 0.008(4) -0.015(4) -0.026(4)
O1 0.160(9) 0.224(13) 0.196(11) -0.011(9) 0.074(9) -0.084(9)
C42 0.160(12) 0.092(7) 0.122(9) -0.026(7) 0.072(9) -0.055(8)
C43 0.077(6) 0.054(5) 0.249(15) -0.041(7) 0.090(8) -0.025(5)

_geom_special_details
;
 All esds (except the esd in the dihedral angle between two l.s. planes)
 are estimated using the full covariance matrix.  The cell esds are taken
 into account individually in the estimation of esds in distances, angles
 and torsion angles; correlations between esds in cell parameters are only
 used when they are defined by crystal symmetry.  An approximate (isotropic)
 treatment of cell esds is used for estimating esds involving l.s. planes.
;

loop_
 _geom_bond_atom_site_label_1
 _geom_bond_atom_site_label_2
 _geom_bond_distance
 _geom_bond_site_symmetry_2
 _geom_bond_publ_flag
Fe1 N11 2.121(4) 3_666 ?
Fe1 N11 2.121(4) . ?
Fe1 N21 2.154(4) . ?
Fe1 N21 2.154(4) 3_666 ?
Fe1 N1 2.306(4) 3_666 ?
Fe1 N1 2.306(4) . ?
N1 C10 1.484(7) . ?
N1 C30 1.490(6) . ?
N1 C20 1.495(6) . ?
N11 N12 1.330(6) . ?
N11 C11 1.344(7) . ?
N12 N13 1.319(6) . ?
N13 C12 1.346(7) . ?
N13 C13 1.492(7) . ?
N21 N22 1.315(6) . ?
N21 C21 1.365(6) . ?
N22 N23 1.342(6) . ?
N23 C22 1.355(7) . ?
N23 C23 1.490(6) . ?
N31 N32 1.308(7) . ?
N31 C31 1.364(7) . ?
N32 N33 1.341(7) . ?
N33 C32 1.356(7) . ?
N33 C33 1.476(8) . ?
C10 C11 1.505(7) . ?
C11 C12 1.372(8) . ?
C13 C14 1.489(8) . ?
C14 C19 1.390(8) . ?
C14 C15 1.396(8) . ?
C15 C16 1.380(8) . ?
C16 C17 1.401(9) . ?
C17 C18 1.370(9) . ?
C18 C19 1.386(9) . ?
C20 C21 1.487(7) . ?
C21 C22 1.373(7) . ?
C23 C24 1.497(8) . ?
C24 C25 1.391(8) . ?
C24 C29 1.392(8) . ?
C25 C26 1.361(9) . ?
C26 C27 1.375(10) . ?
C27 C28 1.377(11) . ?
C28 C29 1.382(10) . ?
C30 C31 1.496(7) . ?
C31 C32 1.375(8) . ?
C33 C34 1.519(10) . ?
C34 C39 1.368(10) . ?
C34 C35 1.405(10) . ?
C35 C36 1.365(11) . ?
C36 C37 1.366(16) . ?
C37 C38 1.343(16) . ?
C38 C39 1.446(14) . ?
B1A F2A 1.379(7) . ?
B1A F4A 1.381(7) . ?
B1A F3A 1.384(7) . ?
B1A F1A 1.389(7) . ?
B1B F4B 1.368(8) . ?
B1B F1B 1.371(8) . ?
B1B F3B 1.373(8) . ?
B1B F2B 1.377(8) . ?
O1 C42 1.481(15) . ?
C42 C43 1.488(17) . ?

loop_
 _geom_angle_atom_site_label_1
 _geom_angle_atom_site_label_2
 _geom_angle_atom_site_label_3
 _geom_angle
 _geom_angle_site_symmetry_1
 _geom_angle_site_symmetry_3
 _geom_angle_publ_flag
N11 Fe1 N11 180.0(2) 3_666 . ?
N11 Fe1 N21 86.45(16) 3_666 . ?
N11 Fe1 N21 93.54(16) . . ?
N11 Fe1 N21 93.55(16) 3_666 3_666 ?
N11 Fe1 N21 86.45(16) . 3_666 ?
N21 Fe1 N21 179.997(1) . 3_666 ?
N11 Fe1 N1 73.47(15) 3_666 3_666 ?
N11 Fe1 N1 106.53(15) . 3_666 ?
N21 Fe1 N1 102.01(15) . 3_666 ?
N21 Fe1 N1 77.99(15) 3_666 3_666 ?
N11 Fe1 N1 106.53(15) 3_666 . ?
N11 Fe1 N1 73.47(15) . . ?
N21 Fe1 N1 77.99(15) . . ?
N21 Fe1 N1 102.01(15) 3_666 . ?
N1 Fe1 N1 180.0 3_666 . ?
C10 N1 C30 111.6(4) . . ?
C10 N1 C20 109.4(4) . . ?
C30 N1 C20 110.3(4) . . ?
C10 N1 Fe1 105.1(3) . . ?
C30 N1 Fe1 113.6(3) . . ?
C20 N1 Fe1 106.6(3) . . ?
N12 N11 C11 109.9(4) . . ?
N12 N11 Fe1 130.0(3) . . ?
C11 N11 Fe1 113.5(3) . . ?
N13 N12 N11 105.6(4) . . ?
N12 N13 C12 112.6(4) . . ?
N12 N13 C13 118.1(4) . . ?
C12 N13 C13 128.9(5) . . ?
N22 N21 C21 111.1(4) . . ?
N22 N21 Fe1 133.1(3) . . ?
C21 N21 Fe1 114.6(3) . . ?
N21 N22 N23 105.4(4) . . ?
N22 N23 C22 111.9(4) . . ?
N22 N23 C23 118.8(4) . . ?
C22 N23 C23 129.3(4) . . ?
N32 N31 C31 109.6(5) . . ?
N31 N32 N33 107.0(5) . . ?
N32 N33 C32 111.2(5) . . ?
N32 N33 C33 120.5(5) . . ?
C32 N33 C33 128.0(5) . . ?
N1 C10 C11 108.6(4) . . ?
N11 C11 C12 107.8(5) . . ?
N11 C11 C10 118.8(4) . . ?
C12 C11 C10 133.3(5) . . ?
N13 C12 C11 104.1(5) . . ?
C14 C13 N13 107.7(4) . . ?
C19 C14 C15 118.4(5) . . ?
C19 C14 C13 121.7(5) . . ?
C15 C14 C13 119.7(5) . . ?
C16 C15 C14 121.2(5) . . ?
C15 C16 C17 119.3(6) . . ?
C18 C17 C16 119.9(6) . . ?
C17 C18 C19 120.5(6) . . ?
C18 C19 C14 120.6(5) . . ?
C21 C20 N1 111.5(4) . . ?
N21 C21 C22 106.8(4) . . ?
N21 C21 C20 119.1(4) . . ?
C22 C21 C20 134.0(4) . . ?
N23 C22 C21 104.8(4) . . ?
N23 C23 C24 112.4(4) . . ?
C25 C24 C29 118.5(6) . . ?
C25 C24 C23 121.5(5) . . ?
C29 C24 C23 120.1(5) . . ?
C26 C25 C24 121.4(6) . . ?
C25 C26 C27 119.9(6) . . ?
C26 C27 C28 119.9(6) . . ?
C27 C28 C29 120.6(7) . . ?
C28 C29 C24 119.7(6) . . ?
N1 C30 C31 114.3(4) . . ?
N31 C31 C32 107.9(5) . . ?
N31 C31 C30 120.8(5) . . ?
C32 C31 C30 131.3(5) . . ?
N33 C32 C31 104.3(5) . . ?
N33 C33 C34 112.9(5) . . ?
C39 C34 C35 119.3(8) . . ?
C39 C34 C33 120.7(8) . . ?
C35 C34 C33 120.0(6) . . ?
C36 C35 C34 121.0(9) . . ?
C35 C36 C37 119.7(10) . . ?
C38 C37 C36 121.8(10) . . ?
C37 C38 C39 119.6(10) . . ?
C34 C39 C38 118.6(10) . . ?
F2A B1A F4A 116.5(7) . . ?
F2A B1A F3A 109.1(6) . . ?
F4A B1A F3A 105.3(7) . . ?
F2A B1A F1A 107.9(6) . . ?
F4A B1A F1A 110.7(7) . . ?
F3A B1A F1A 107.0(7) . . ?
F4B B1B F1B 110.1(9) . . ?
F4B B1B F3B 111.2(8) . . ?
F1B B1B F3B 112.6(9) . . ?
F4B B1B F2B 107.2(9) . . ?
F1B B1B F2B 109.1(9) . . ?
F3B B1B F2B 106.5(8) . . ?
O1 C42 C43 105.7(10) . . ?

_diffrn_measured_fraction_theta_max    0.993
_diffrn_reflns_theta_full              25.70
_diffrn_measured_fraction_theta_full   0.993
_refine_diff_density_max    1.406
_refine_diff_density_min   -0.740
_refine_diff_density_rms    0.098
